# Supplementary material
Source: PubMed Central journal article supplement (PMC6289713)
Supplement: NIHMS1510112-supplement-1.pdf [file NIHMS1510112-supplement-1.pdf]

## SUPPLEMENTAL MATERIAL:

### Supplemental Data

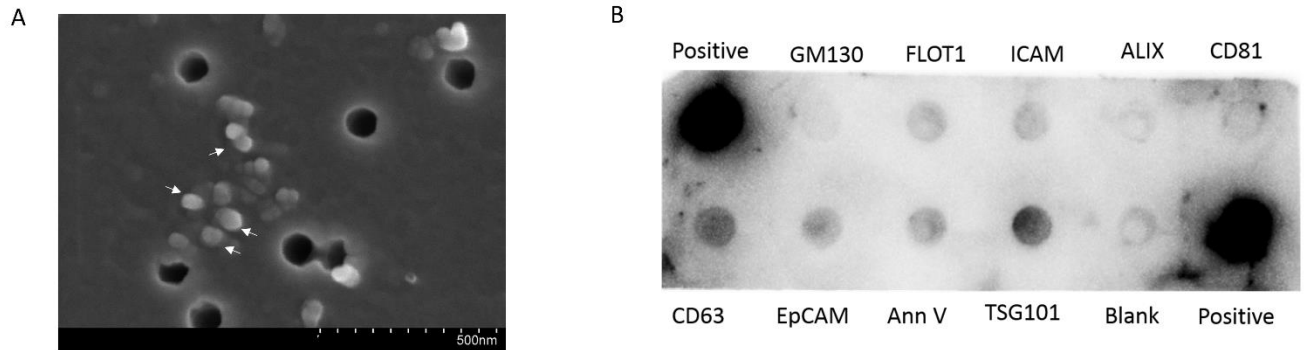

**Figure S1.** Characterization of exosomes isolated from human ovarian tumor ascites fluid. **(A)** Scanning electron microscopy reveals exosomes (white arrows) with a size distribution of 40-70 nm. **(B)** The vesicle composition was determined using an Exosome Antibody Array. Dark spots indicate presence of the marked protein. Absence of a spot for GM130 indicates absence of cellular contaminants in the preparation.

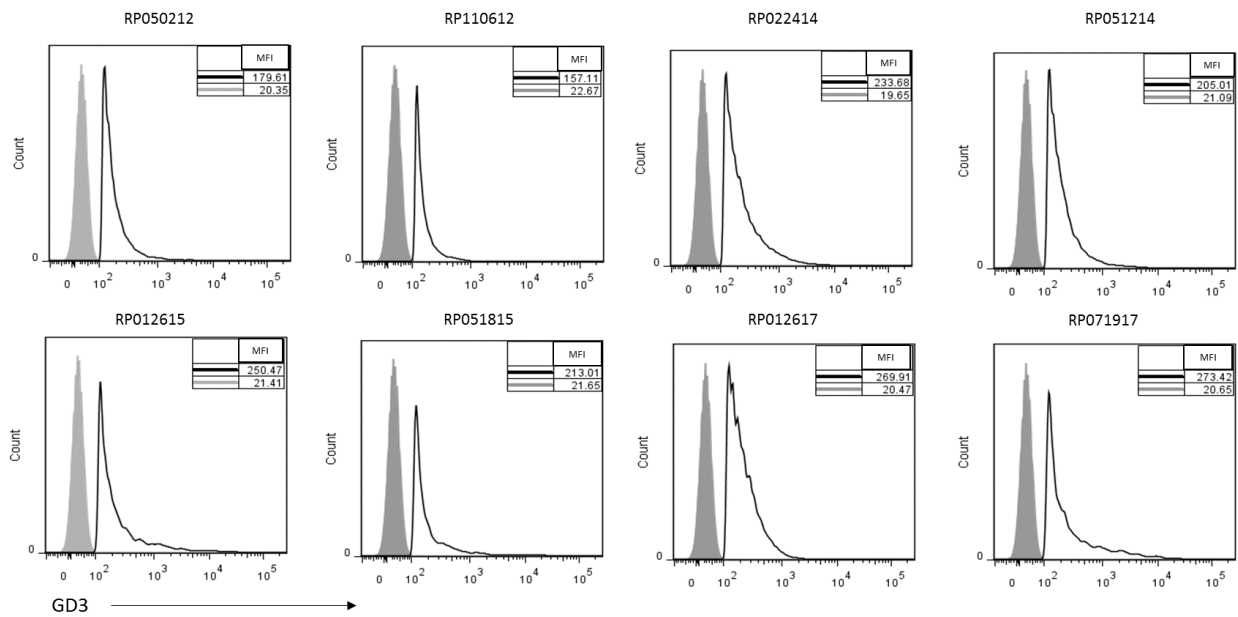

**Figure S2.** GD3 is present on exosomes derived from ovarian tumor ascites fluids. Exosomes derived from ascites fluids of 8 different ovarian cancer patients were attached to latex beads and labeled with secondary antibody only (filled histogram) or with anti-GD3 antibody followed by the secondary antibody (solid line) and data acquired using a flow cytometer. Mean fluorescence intensity of each sample with the respective secondary antibody control is shown in top right corner of each panel.

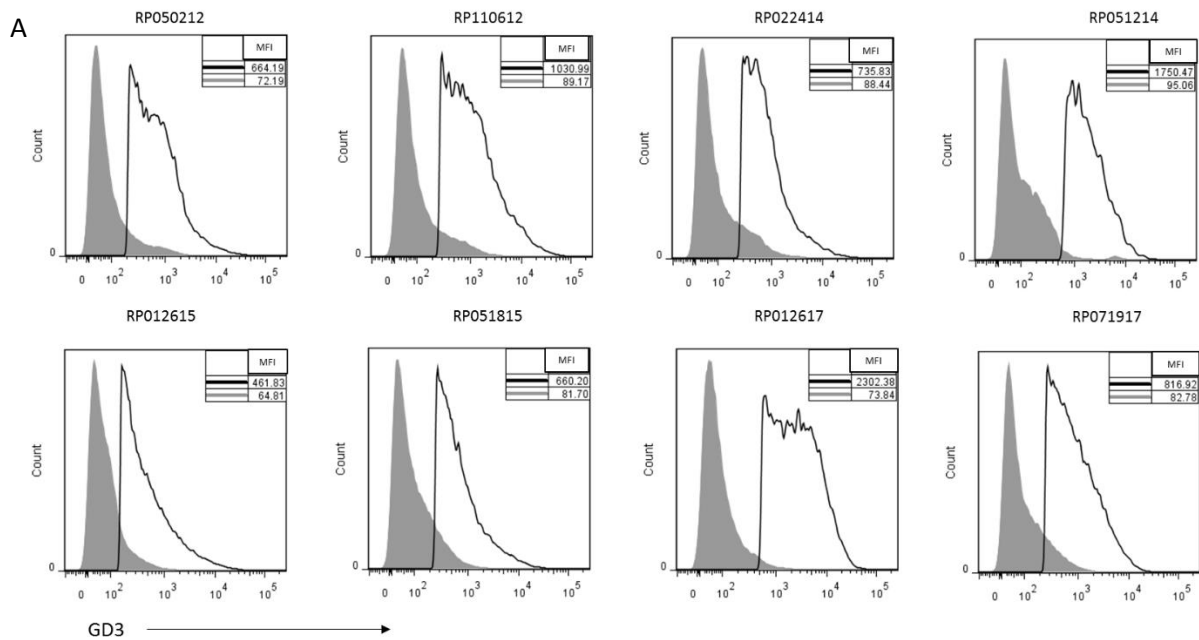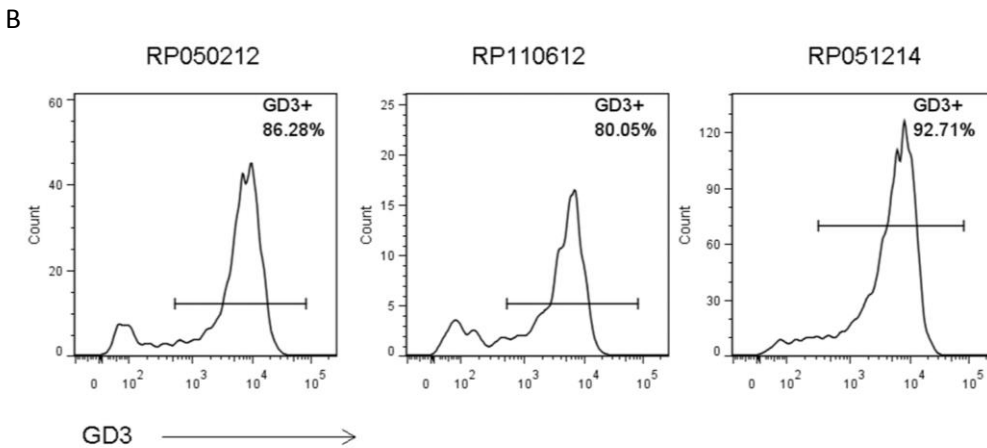

**Figure S3.** GD3 is present on ovarian tumor cells and tumor infiltrating T lymphocytes. **(A)** Expression of GD3 on the surface of ovarian tumor cells (EpCAM+) from 8 different patients was detected by flow cytometry. The cells were labeled with secondary antibody only (filled histogram) only or with anti-GD3 antibody followed by the secondary antibody (solid line) and data acquired using a flow cytometer. Mean fluorescence intensity of each sample with the respective secondary antibody control is shown in top right corner of each panel. **(B)** Expression of GD3 on the surface of T cells (CD3+) present in primary ovarian tumors from 3 different patients was determined by flow cytometry.

**Supplementary Table 1.** List of reagents used in flow cytometry and confocal microscopy.

| Reagent                | Fluorochrome   | Manufacturer             | Catalog #   |
|------------------------|----------------|--------------------------|-------------|
| anti-CD3               | Unconjugated   | BD Biosciences           | 347340      |
|                        | PE             |                          | 555333      |
|                        | Pacific Blue   |                          | 558117      |
| anti-CD69              | FITC           |                          | 347823      |
| anti-IFN- $\gamma$     | APC            |                          | 554702      |
| anti-IL-2              | PE             |                          | 340450      |
| EpCAM                  | PE             | Miltenyi                 | 130-098-115 |
| anti-NF $\kappa$ B p65 | Unconjugated   | Santa Cruz Biotechnology | sc-372      |
| anti-GD3               | Unconjugated   | Genetex                  | GTX-11779   |
| Goat anti-rabbit IgG   | AlexaFluor 488 | Life Technologies        | A11008      |
| Goat anti-mouse IgG    | AlexaFluor 568 |                          | A11004      |
| Goat anti-mouse IgG    | AlexaFluor 488 |                          | A11029      |
| Sytox Red              | -              |                          | S34859      |
